# Supplementary material for: Long-Term Engraftment of ESC-Derived B-1 Progenitor Cells Supports HSC-Independent Lymphopoiesis
Source: PubMed Central journal article supplement — Stem Cell Reports. 2019 Feb 7;12(3):572–83. doi: 10.1016/j.stemcr.2019.01.006 (PMC6409422; doi:10.1016/j.stemcr.2019.01.006), 2019-02-07
Supplement: mmc1.pdf [file mmc1.pdf]

**Stem Cell Reports, Volume 12**

**Supplemental Information**

**Long-Term Engraftment of ESC-Derived B-1 Progenitor Cells Supports  
HSC-Independent Lymphopoiesis**

**Yang Lin, Michihiro Kobayashi, Nathalia Azevedo Portilho, Akansha Mishra, Hongyu Gao, Yunlong Liu, Pamela Wenzel, Brian Davis, Mervin C. Yoder, and Momoko Yoshimoto**

|        | <b>B cell subsets</b> | <b>Surface phenotype</b>                                                           |
|--------|-----------------------|------------------------------------------------------------------------------------|
| PerC   | B-2                   | IgM <sup>+</sup> CD23 <sup>+</sup>                                                 |
|        | B-1a                  | IgM <sup>hi</sup> CD23 <sup>lo-neg</sup> CD11b <sup>+</sup> CD5 <sup>+</sup>       |
|        | B-1b                  | IgM <sup>hi</sup> CD23 <sup>lo-neg</sup> CD11b <sup>+</sup> CD5 <sup>-</sup>       |
| Spleen | Follicular B (FO)     | AA4.1 <sup>-</sup> IgM <sup>+</sup> CD23 <sup>+</sup>                              |
|        | Marginal zone B (MZ)  | AA4.1 <sup>-</sup> IgM <sup>hi</sup> CD23 <sup>lo-neg</sup> CD21 <sup>hi</sup>     |
|        | B-1                   | AA4.1 <sup>-</sup> IgM <sup>hi</sup> CD23 <sup>lo-neg</sup> CD21 <sup>lo-neg</sup> |

**Supplementary Table 1: Surface markers for B-cell subsets (related to Figures 1, 2, and 3)**

PerC: peritoneal cells

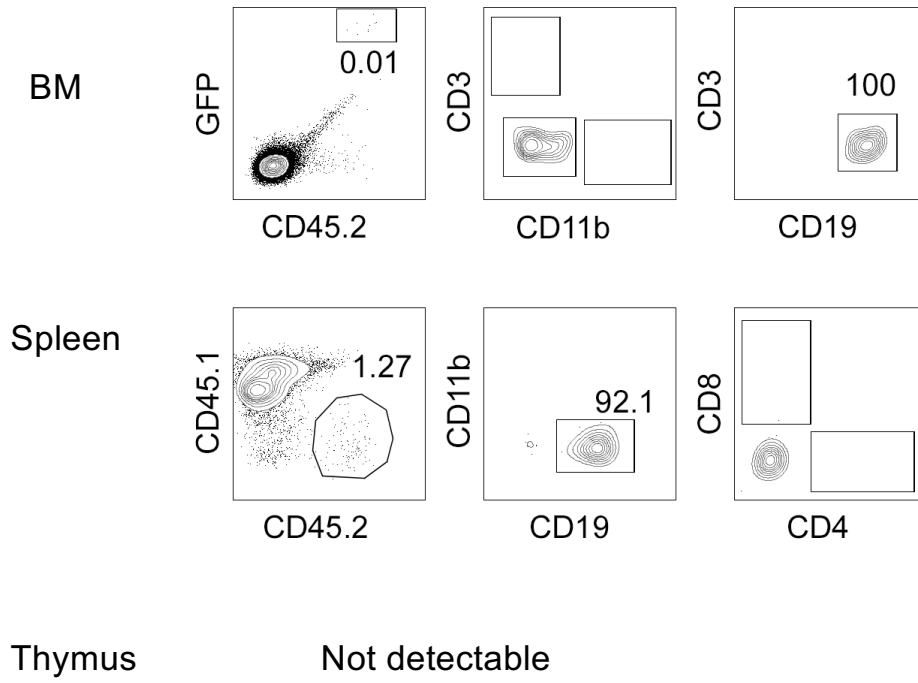

**Supplementary Figure (related to Figure 1, 2)**

ES-derived cells in the recipient BM (upper panel) and spleen (lower panel) are depicted at 4 months after transplantation. Representative FACS plots are shown among 50 transplanted mice.
